# Supplementary material for: Multiple cis-regulatory elements control prox1a expression in distinct lymphatic vascular beds
Source: PubMed Central journal article supplement (PMC11128278; doi:10.1242/dev.202525), 2024-05-09
Supplement: develop-151-202525-s1.pdf [file develop-151-202525-s1.pdf]

### A prox1a locus microsynteny in vertebrates

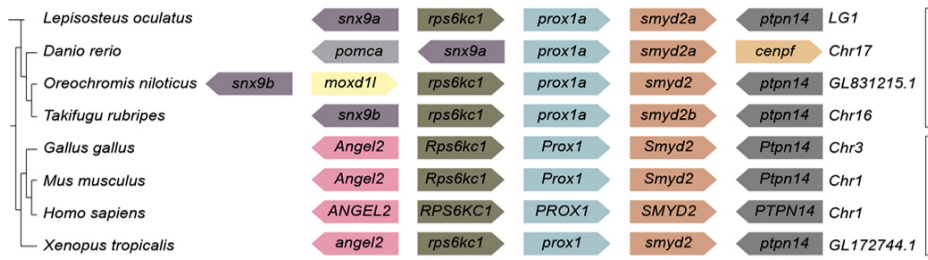

### B prox3 locus conservation

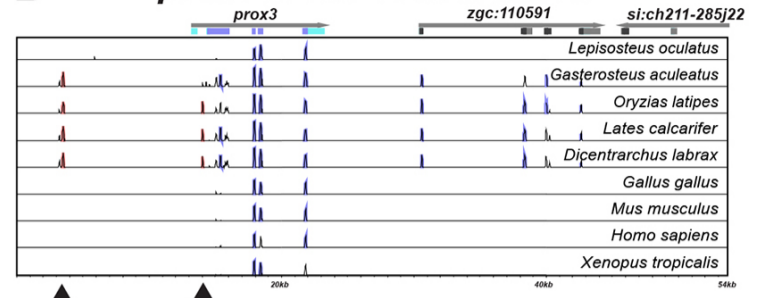

### C Summary of the identified prox1a enhancers

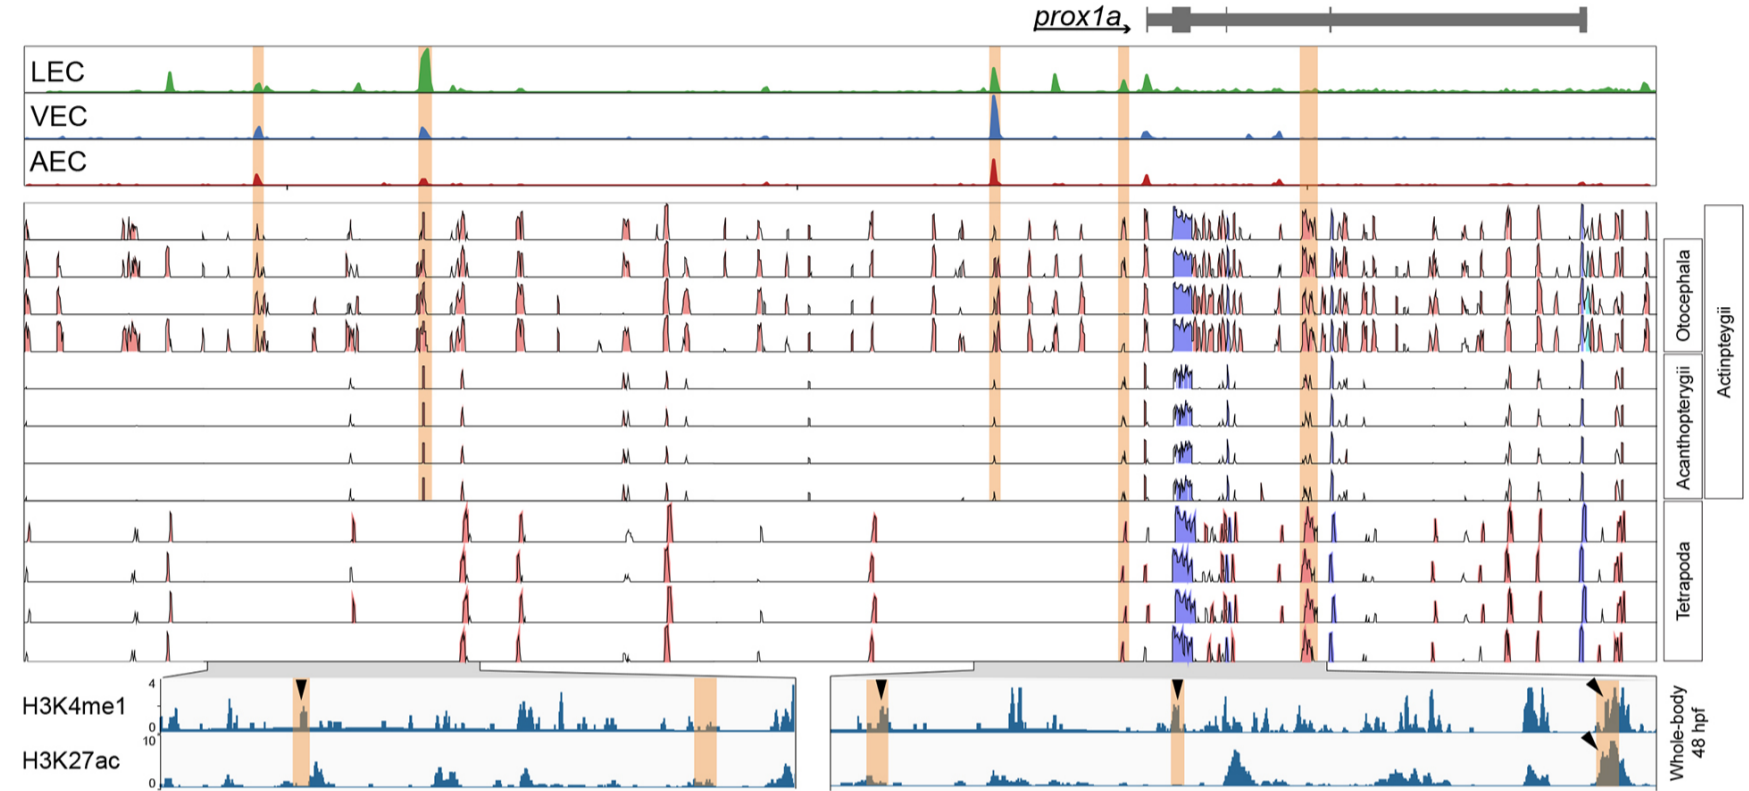

### D Multiz and PhyloP alignment to human

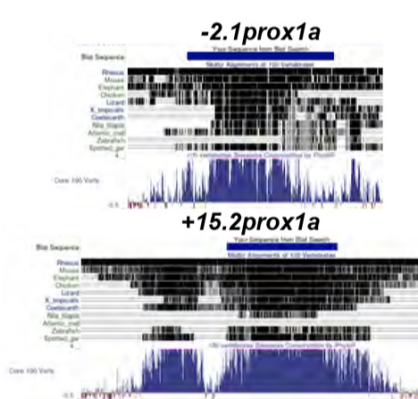

### E Tg(+15.2prox1a:EGFP;XCA:DsRed2); TgBAC(prox1a:RFP)

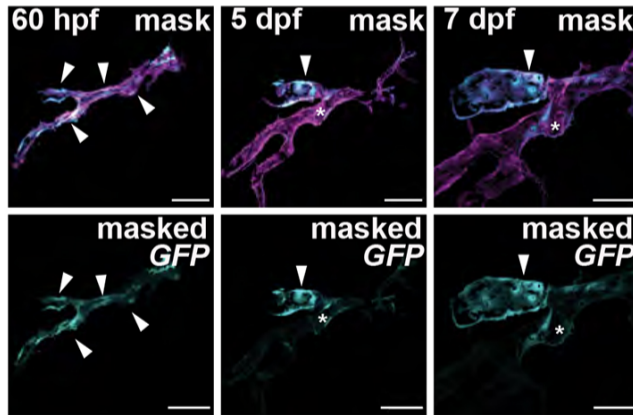

### F Tg(+15.2prox1a:EGFP;XCA:DsRed2); Tg(kdr1:ras-cherry)

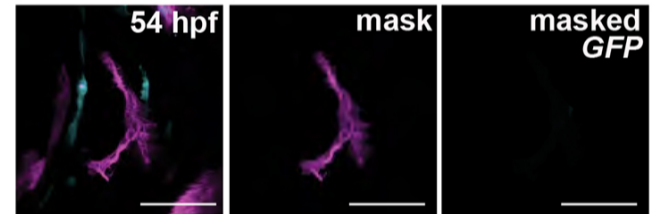

### G Tg(+15.2prox1a:EGFP;XCA:DsRed2); Tg(kdr-l:ras-cherry)

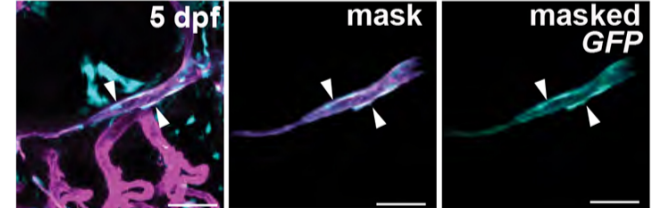

### H Tg(+15.2prox1a:EGFP; XCA:DsRed2); TgBAC(prox1a:RFP)

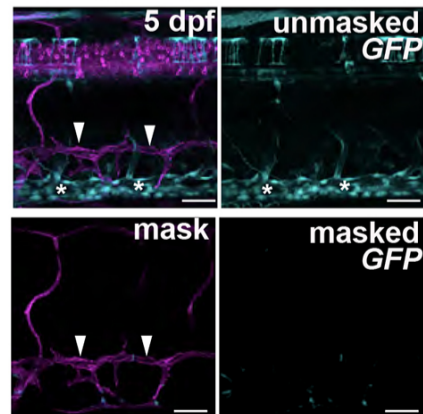

### I +15.2prox1a whole-body image Tg(+15.2prox1a:basEGFP;ACry:GFP); TgBAC(prox1a:RFP)

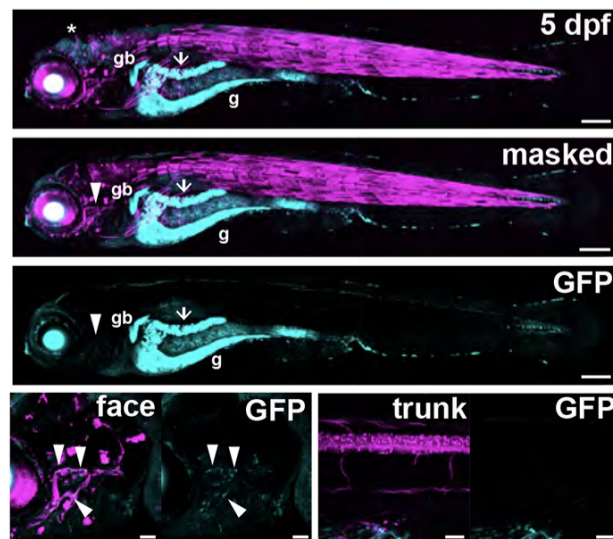

### J +15.2prox1a\_1

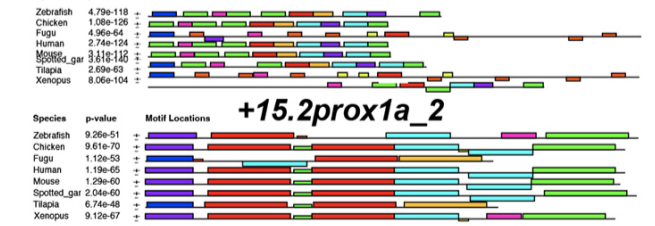

### +15.2prox1a\_2

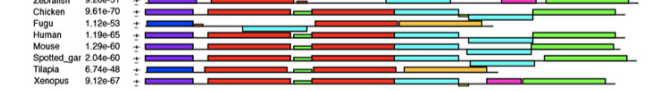

Motif key 1 2 3 4 5 6 7 8 9 10

### K +15.2prox1a conserved binding sites

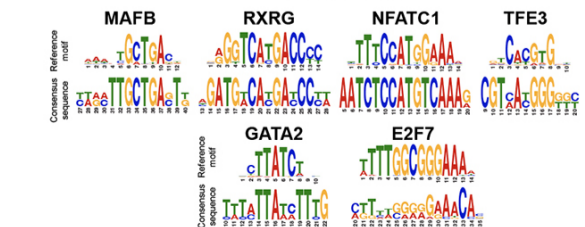

**Fig. S1. CREs identification and additional +15.2*prox1a* enhancer characterisation (A)**

Microsynteny surrounding the vertebrate *Prox1/prox1a* locus. Downstream of *Prox1/prox1a*, *Smyd2* is found in all analysed sequences. Upstream of *Prox1/prox1a*, *Rps6ck1* is found in all species, except zebrafish. The annotations used are listed in Table S1.

(B) Conservation analysis of the 54 kbp region surrounding the *prox3* locus compared to nine vertebrate species. Results are shown compared to zebrafish. Blue peaks: Exons; red peaks: Region of conserved non-coding DNA; black arrowheads: Conserved peaks.

(C) Schematics showing the identified *prox1a* enhancers, the snATAC signature in LEC and VEC, the conservation across Osteichthyes and the H3K4me1 and H3K27ac signature from whole embryos at 48 hpf, indicating primed and active enhancers. Orange: position of the identified enhancers. Arrowheads: H3K4me1 and H3K27ac signals in correspondence to the *prox1a* enhancers.

(D) Multiz alignment and PhyloP tracks from the UCSC Genome browser showing conservation across vertebrates of +15.2*prox1a* and -2.1*prox1a*. Conservation is shown compared to human.

(E) Masked confocal projections of the image in Fig. 1C. Arrowheads: expression in the facial LECs (60 hpf) and FCLV (5 and 7 dpf). Asterisks: Expression in facial lymphatic endothelium.

(F) Confocal projections of VA-L labelled with *Tg(+15.2prox1a:EGFP;XCA:DsRed2)<sup>uu7kk</sup>* (cyan) and *Tg(prox1a:RFP)<sup>nim5</sup>* (magenta) at 54 hpf, showing no lymphatic expression.

(G) Confocal projections of the primary head sinus labelled with *Tg(+15.2prox1a\_1:EGFP;XCA:DsRed2)<sup>uu7kk</sup>* at 5 dpf, showing +15.2*prox1a* driven venous expression (arrowhead).

(H) Confocal projections of trunk lymphatics labelled with *Tg(+15.2prox1a:EGFP;XCA:DsRed2)<sup>uu7kk</sup>* (cyan) and *Tg(prox1a:RFP)<sup>nim5</sup>* (magenta) at 5 dpf. Arrowheads: lymphatic vessels. Asterisks: posterior cardinal vein.

(I) Embryo labelled with *Tg(+15.2prox1a:basEGFP;ACry:GFP)<sup>uu13kk</sup>* (cyan) and *Tg(prox1a:RFP)<sup>nim5</sup>* (magenta). Arrowhead: expression in the FCLV and facial lymphatics. Asterisks: expression in the skin. Arrow: expression in the pancreas. g: expression in the gut. gb: expression in the gallbladder. Scale bar: 200  $\mu$ m.

(J) Conserved motif structure of the identified lymphatic +15.2*prox1a* enhancer. Motif sequences are listed in Table S4.

(K) Predicted conserved binding site for +15.2*prox1a* in vertebrates. Motif locations are listed in Table S4.

Scales bars represent 50 $\mu$ m unless otherwise stated.

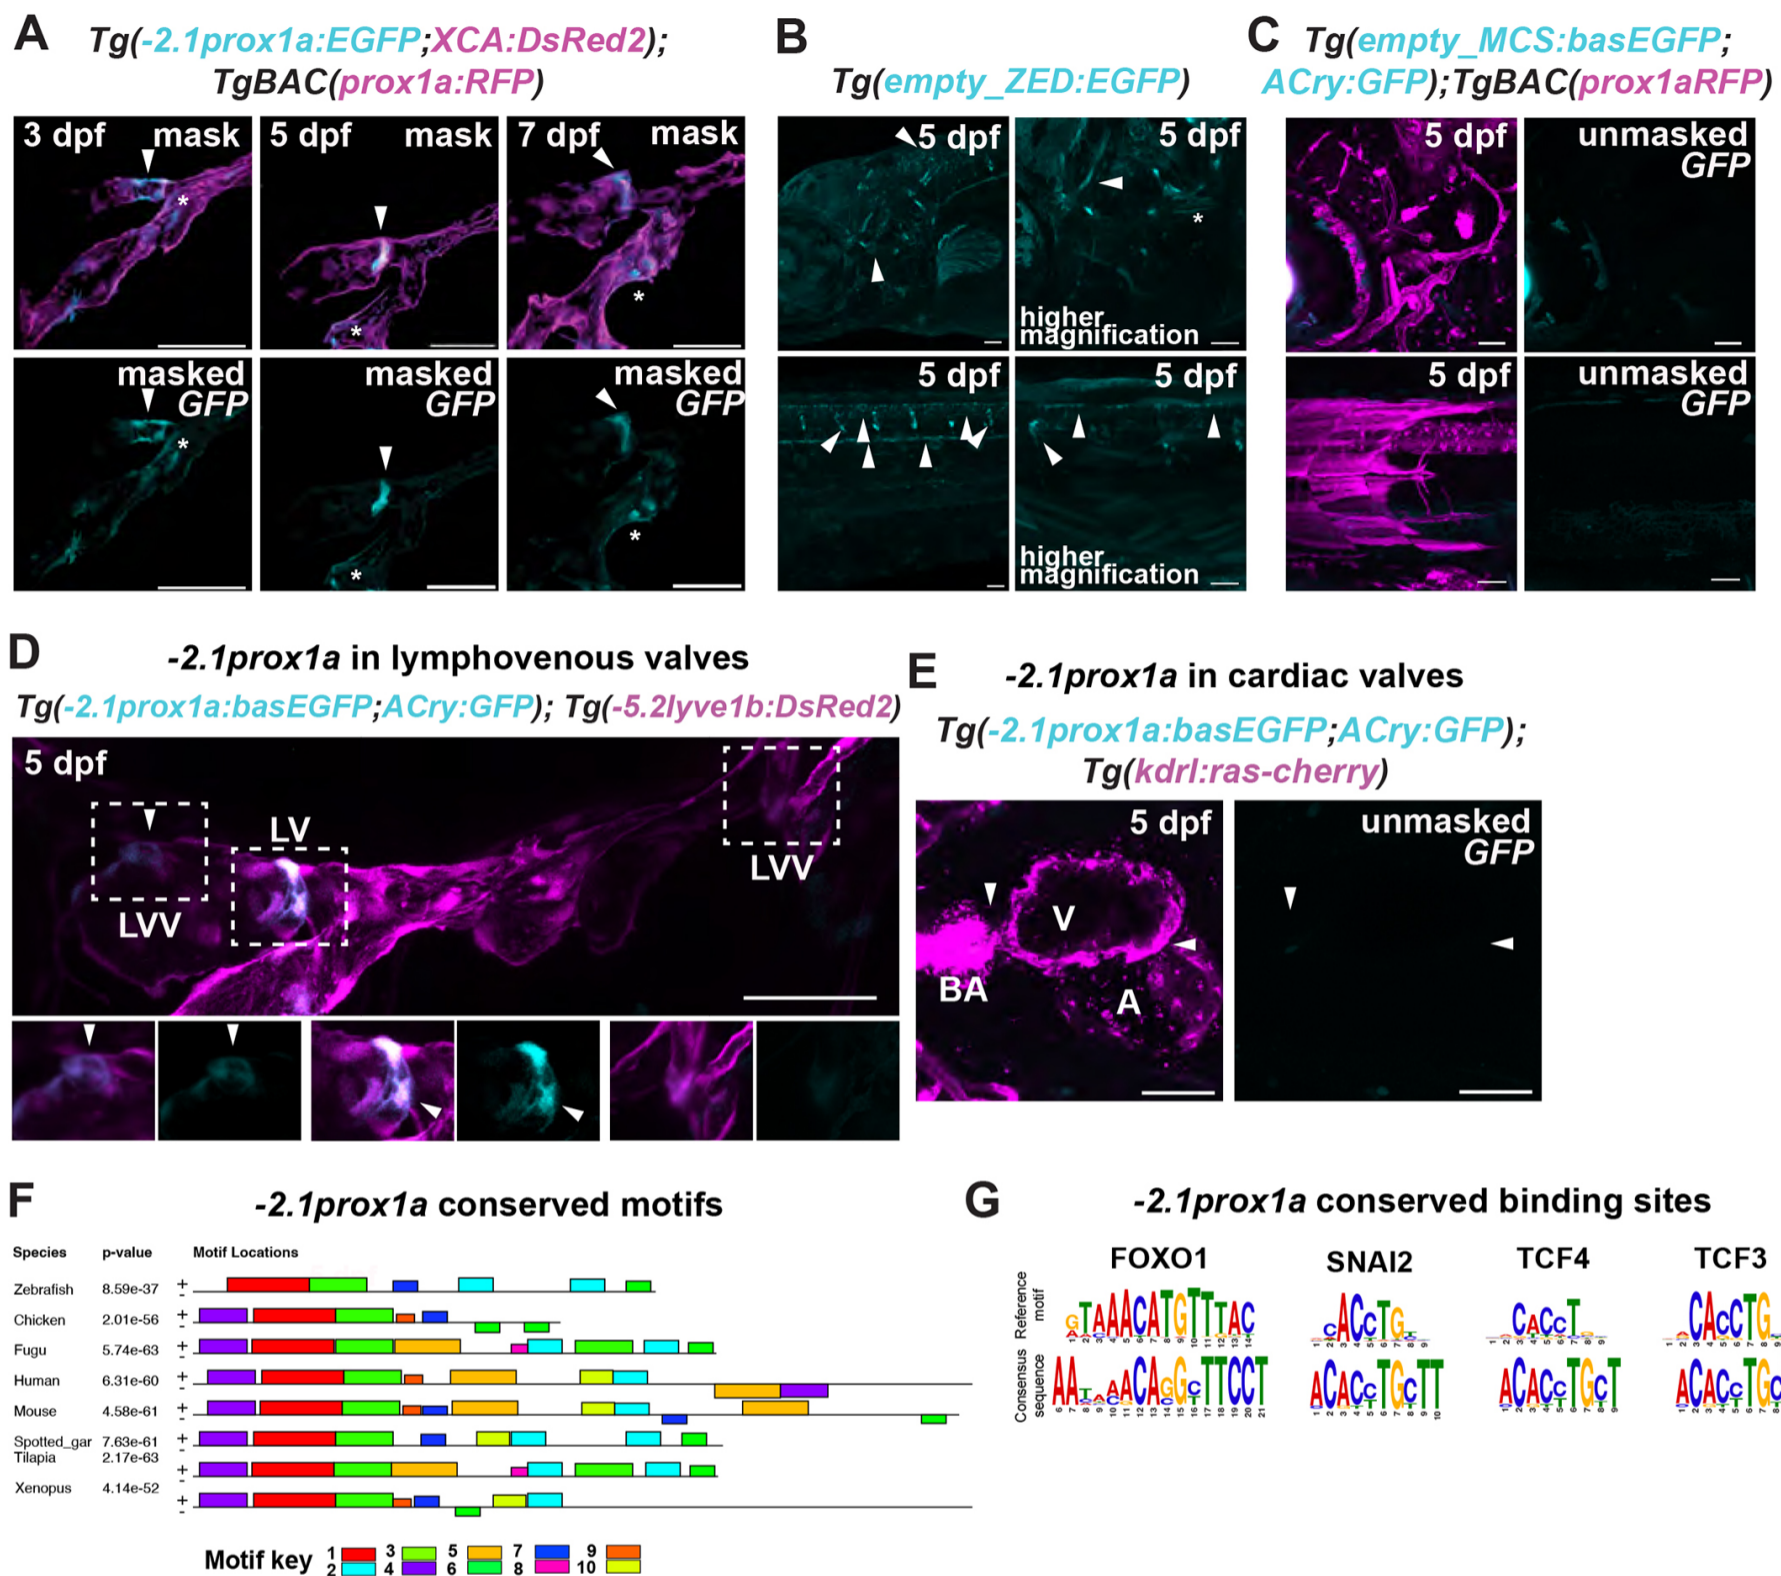

**Fig. S2. Additional -2.1prox1a enhancer characterisation**

(A) Masked confocal projections of the image in Fig. 2A. Arrowheads: Expression in the developing lymphatic valve. Asterisks: Expression in the facial lymphatic endothelium.

(B) Confocal projections of facial (top) and trunk (bottom) lymphatics at 5 dpf labelled with the empty ZED vector as a control. Arrowheads: Neuronal structures.

(C) Confocal projections of facial and trunk lymphatics at 5 dpf labelled with *Tg(prox1a:RFP)<sup>nim5</sup>* (magenta) and injected with *empty\_MCS:basEGFP;ACry:GFP* plasmid to create a transient control.

(D) Confocal projections of the LVVs at 5 dpf labelled with *Tg(-2.1prox1a:basEGFP;ACry:GFP)<sup>uu10kk</sup>* (cyan) and *Tg(-5.2lyve1b:DsRed2)<sup>nz101</sup>* (magenta). Boxes: LVVs and LV position. Arrowheads: expression in the LVV and LV.

(E) Confocal projections of the heart at 5 dpf labelled with *Tg(-2.1prox1a:basEGFP;ACry:GFP)<sup>uu10kk</sup>* (cyan) and *Tg(kdr1:ras-cherry)<sup>s916</sup>* (magenta). A: atrium. V: ventricle. BA: bulbus arteriosus. Arrowheads: cardiac valves position.

(F) Conserved motif structure of the identified lymphatic -2.1prox1a enhancer. The motif sequences are listed in Table S4.

(G) Predicted conserved binding site for -2.1prox1a in vertebrates. Motif locations are listed in Table S4.

Scales bars represent 50µm.

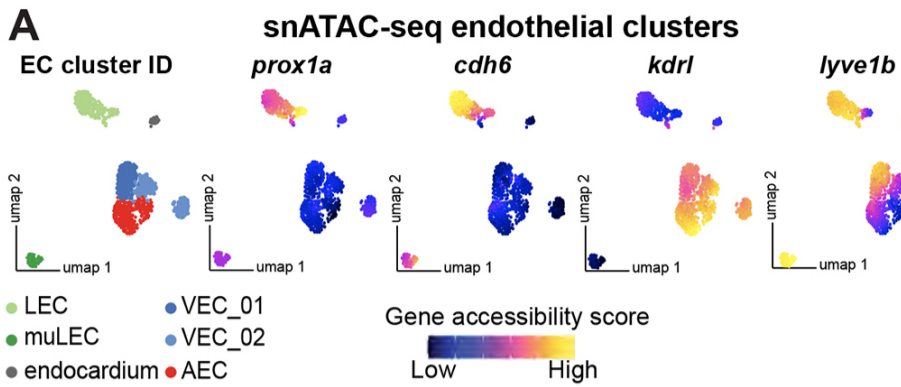

**B Characterisation of Differentially Accessible Peaks**

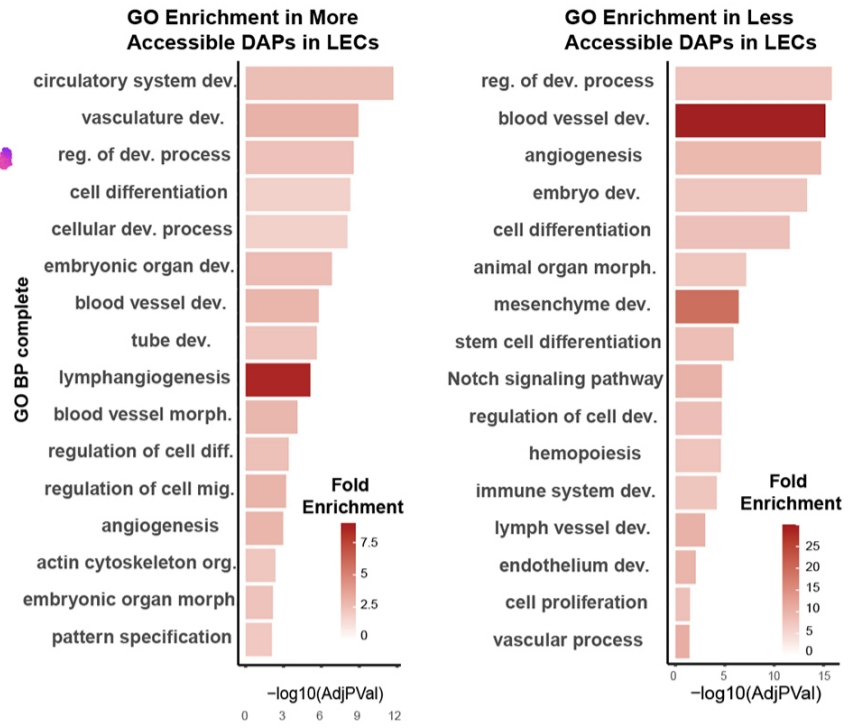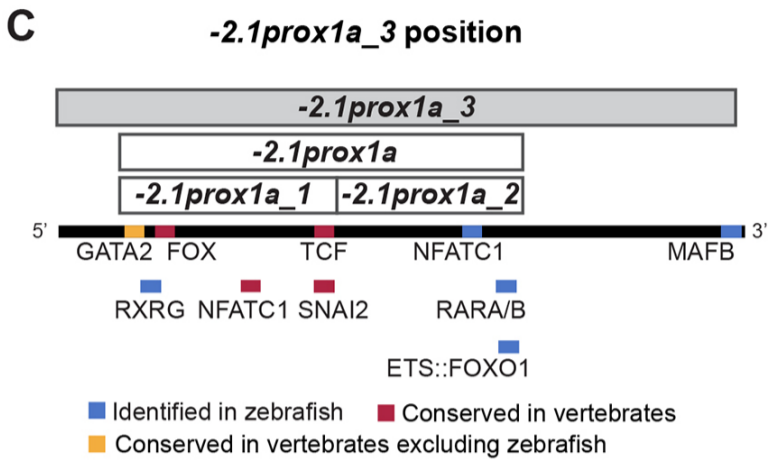

**D -2.1*prox1a*\_3 expression**  
*Tg(-2.1prox1a\_3:EGFP;XCry:DsRed2); TgBAC(prox1a:RFP)*

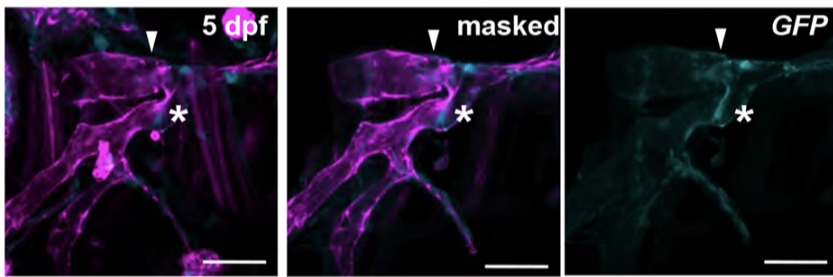

**E -71*prox1a* Multiz alignment to zebrafish**

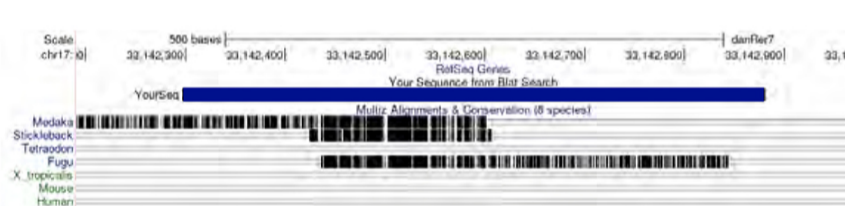

**G -71*prox1a* whole-body image**  
*Tg(-71prox1a:basEGFP;ACry:GFP); TgBAC(prox1a:RFP)*

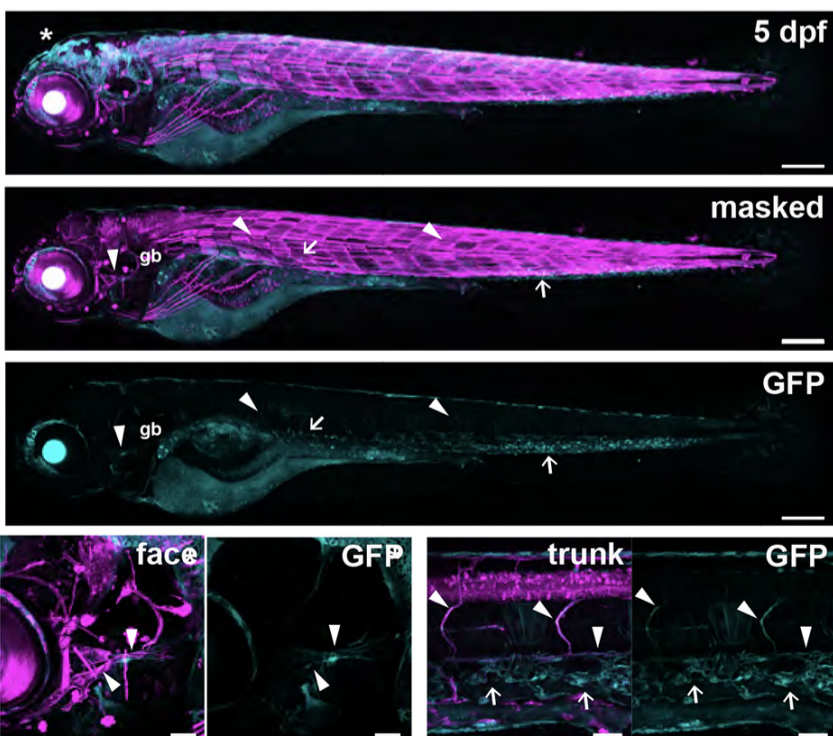

**F -87*prox1a* whole-body image**  
*Tg(-87prox1a:basEGFP;ACry:GFP); TgBAC(prox1a:RFP)*

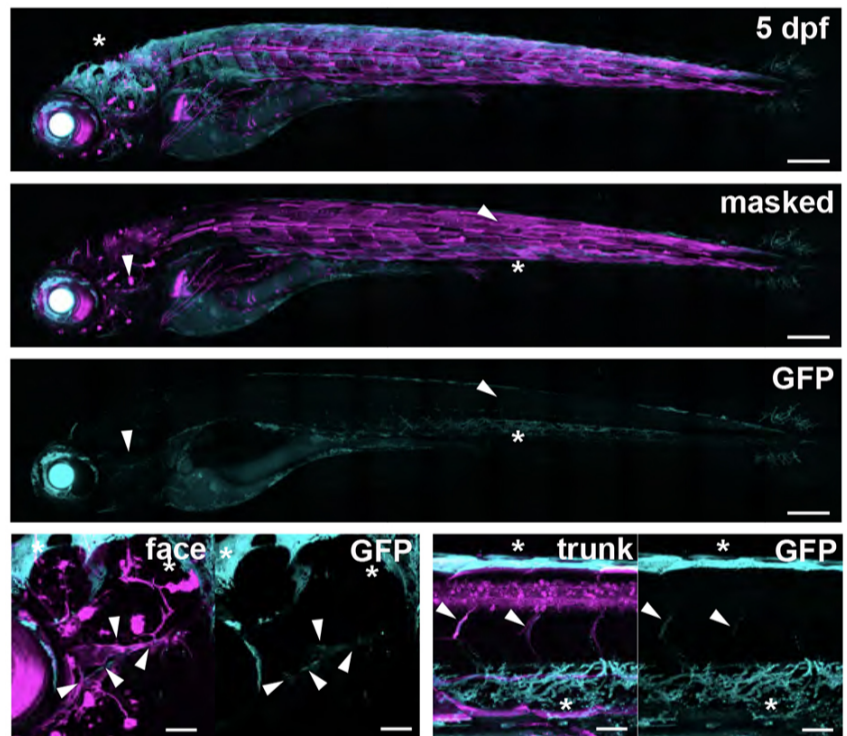

**H -14*prox1a* whole-body image**  
*Tg(-14prox1a:basEGFP;ACry:GFP); TgBAC(prox1a:RFP)*

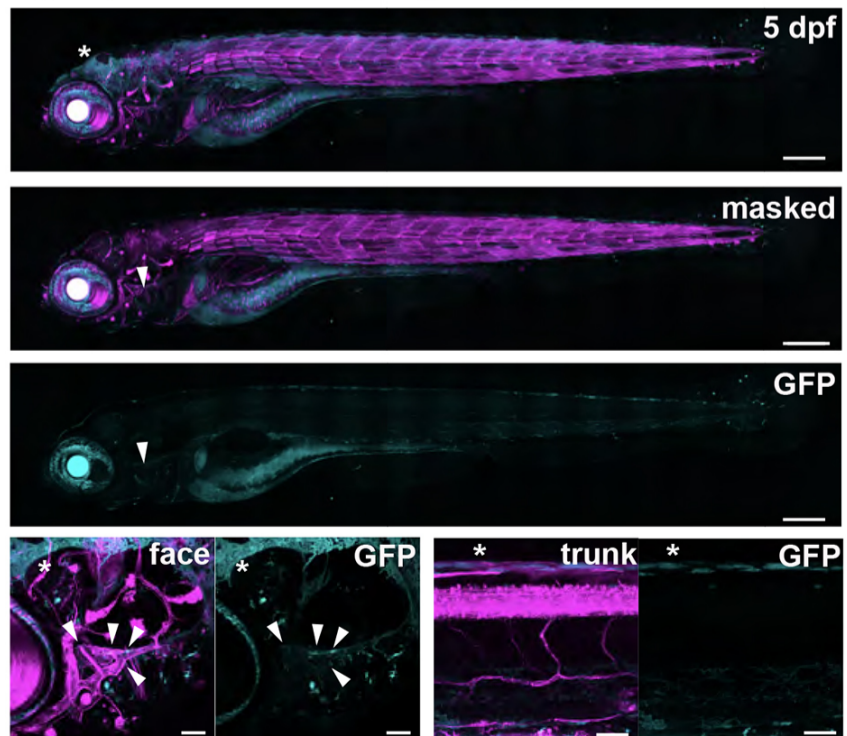

**Fig. S3. snATAC-seq validation and additional ATAC-identified enhancers characterisation**

(A) Clusters of endothelial cells (ECs) and endocardium at 4 dpf with umaps showing the chromatin state at known lymphatics and venous loci. High accessibility at *prox1a* and *cdh6* marks the lymphatic endothelial cell (LECs) cluster. High *kdrl* accessibility marks the venous endothelial cells (VECs) and arterial endothelial cell (AECs) cluster, and high *lyve1b* accessibility marks LECs and VECs. muLECs: Mural lymphatic endothelial cells.

(B) GO enrichment of developmentally relevant terms in differentially accessible peaks in LECs.

(C) Schematic representation of the *-2.1prox1a* enhancer indicating the overlap between the *-2.1prox1a\_3* sequence from the identified peak using the ATAC-sequencing, *-2.1prox1a* identified using the conservation method (Fig. 1A) and the segmentation into *-2.1prox1a\_1* and *-2.1prox1a\_2* (Fig. 4B). Predicted binding for lymphatic-associated transcription factors is indicated below the enhancer fragments. Blue: Binding sites identified in zebrafish ( $p\text{-val} < 1e-04$ ). Red: Conserved binding sites within vertebrates. Yellow: Binding sites conserved in vertebrates but absent in zebrafish.

(D) Confocal projections of facial lymphatics labelled with *Tg(-2.1prox1a\_3:EGFP; XCA:DsRed2)<sup>uom119</sup>* (cyan) and *Tg(prox1a:RFP)<sup>nim5</sup>* (magenta) at 5 dpf. Arrowheads: Expression in the developing lymphatic valve. Asterisks: expression in the facial lymphatic endothelium. Scale bars: 50 $\mu$ m.

(E) UCSC Genome browser Multiz alignment of the *-71prox1a* enhancer in zebrafish, showing conservation in Actinopterygii but not tetrapods.

(F-H) Tile-scan, face and trunk confocal projection of whole F1 embryo at 5dpf. In second and third panels, skin signal has been removed manually. Tile-scan scalebar = 200 $\mu$ m, zoom-in panels scalebar: 50 $\mu$ m.

(F) Embryo labelled with *Tg(-87prox1a:basEGFP;ACry:GFP)<sup>uu14kk</sup>* (cyan) and *Tg(prox1a:RFP)<sup>nim5</sup>* (magenta). Arrowhead: expression in the facial lymphatics. Asterisks: expression in the skin and connective tissue.

(G) Embryo labelled with *Tg(-71prox1a:basEGFP;ACry:GFP)<sup>uu15kk</sup>* (cyan) and *Tg(prox1a:RFP)<sup>nim5</sup>* (magenta). Arrowhead: expression in the lymphatics. Asterisks: expression in the skin. Arrows: expression in the PCV. gb: expression in the gallbladder.

(H) Embryo labelled with *Tg(-14prox1a:basEGFP;ACry:GFP)<sup>uu16kk</sup>* (cyan) and *Tg(prox1a:RFP)<sup>nim5</sup>* (magenta). Arrowhead: expression in the facial lymphatics. Asterisks: expression in the skin.

### A *prox1a* locus microsynteny in Actinopterygii

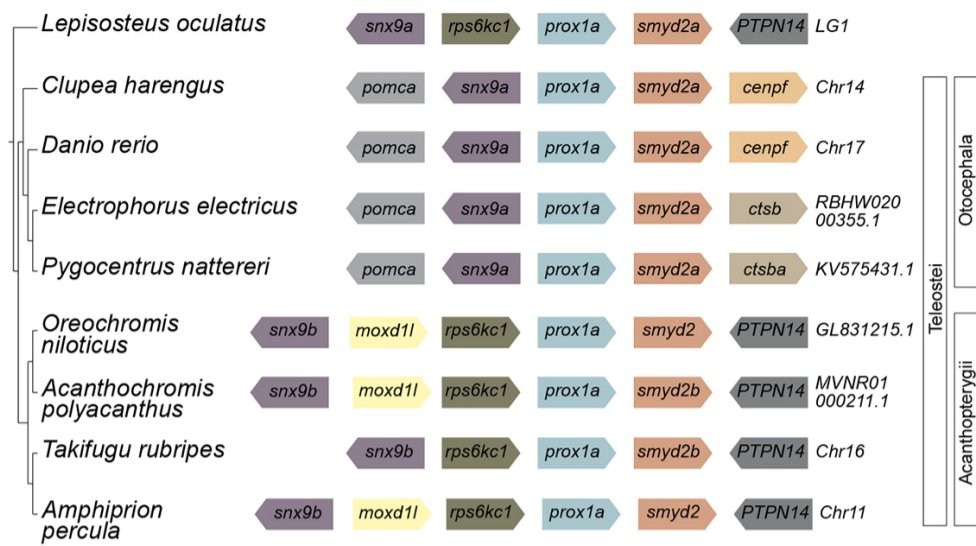

### B Conservation in Actinopterygii

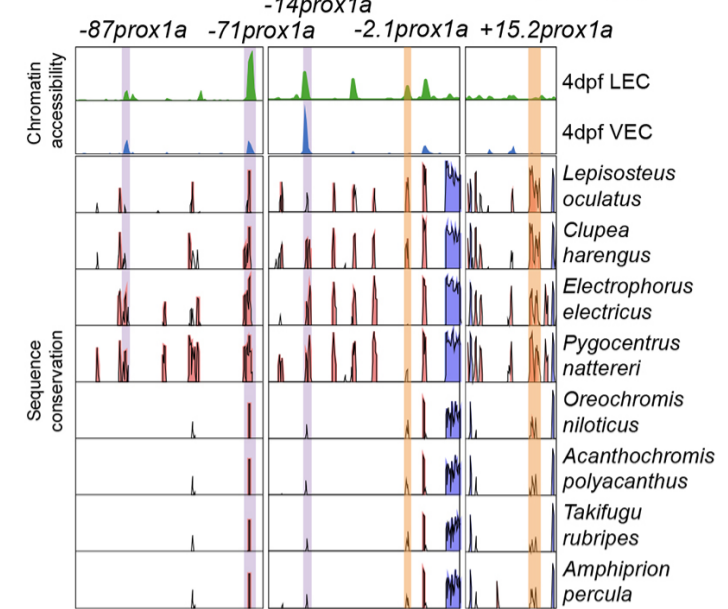

### Conserved motifs in Actinopterygii

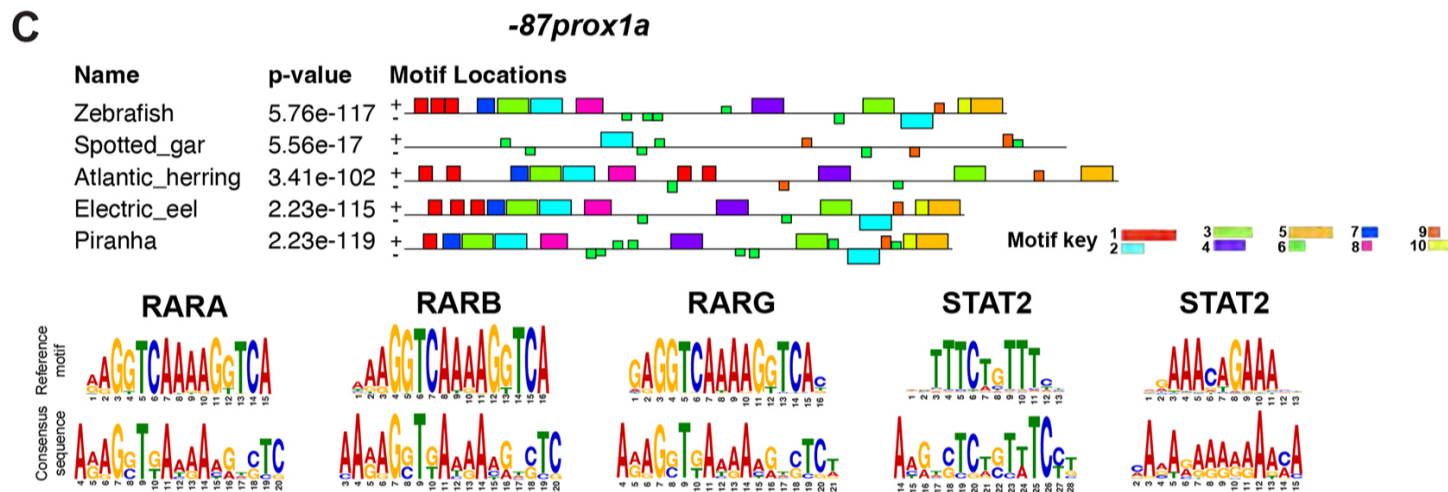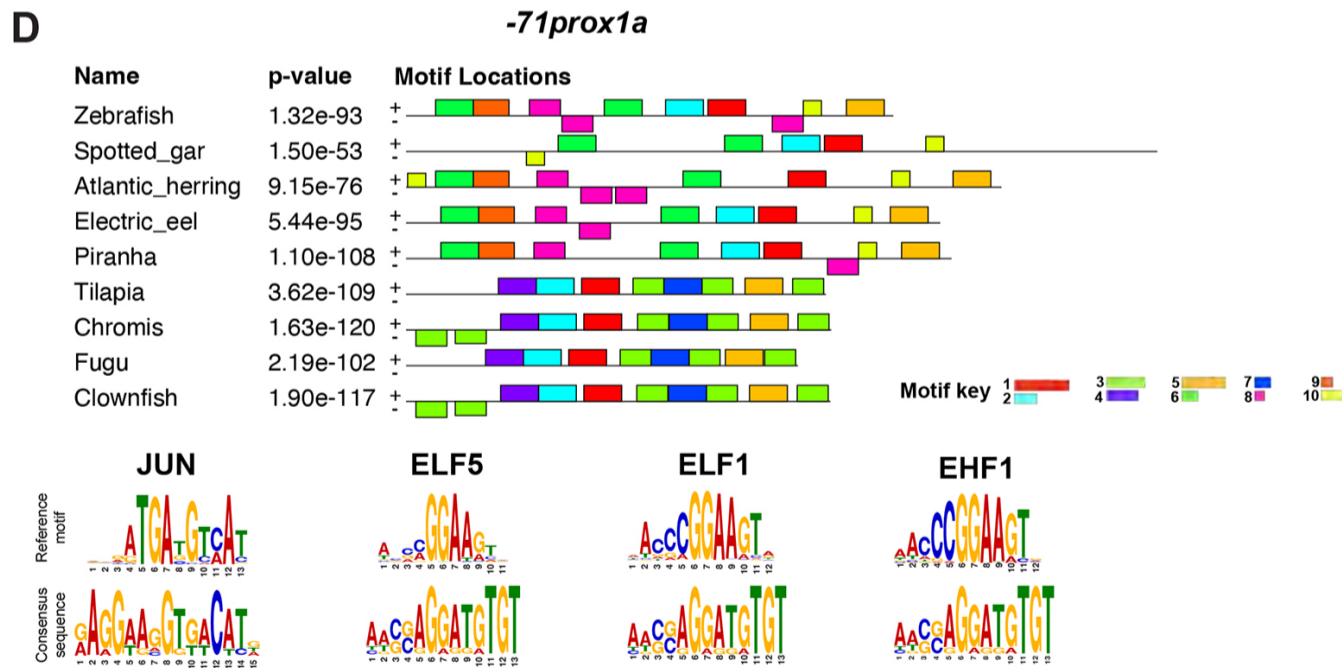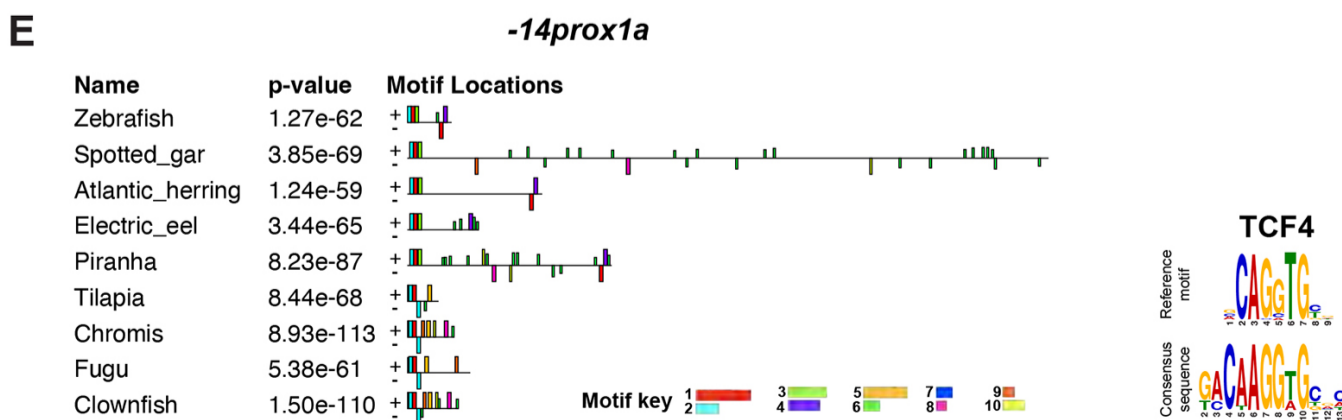

**Fig. S4. *prox1a* microsynteny in Actinopterygii and predicted TFs binding to the snATAC-identified enhancers**

(A) The microsynteny surrounding the Actinopterygii *prox1a* locus. Downstream of *prox1a*, *Smyd2a* is found in all analysed sequences. Upstream of *Prox1/prox1a*, *Rps6ck1* is found in *Lepisosteus oculatus* and Euteleostei, but not in Otocephala. The annotations used are listed in Table 1.

(B) Conservation analysis of the identified *prox1a* enhancers 9 Actinopterygii species. Results are shown compared to zebrafish. Blue peaks: exons; Red peaks: conserved non-coding DNA; Purple bars: snATAC-identified enhancers; Orange bar: conservation-identified enhancers.

(C) Conserved motif structure and predicted conserved binding sites of the identified lymphatic -87*prox1a* enhancer in Actinopterygii. Motif locations are listed in Table S4 and S5.

(D) Conserved motif structure and predicted conserved binding sites of the identified lymphatic -71*prox1a* enhancer in Actinopterygii. Motif locations are listed in Table S4 and S5.

(E) Conserved motif structure and predicted conserved binding sites of the identified lymphatic -14*prox1a* enhancer in Actinopterygii. Motif locations are listed in Table S4 and S5.

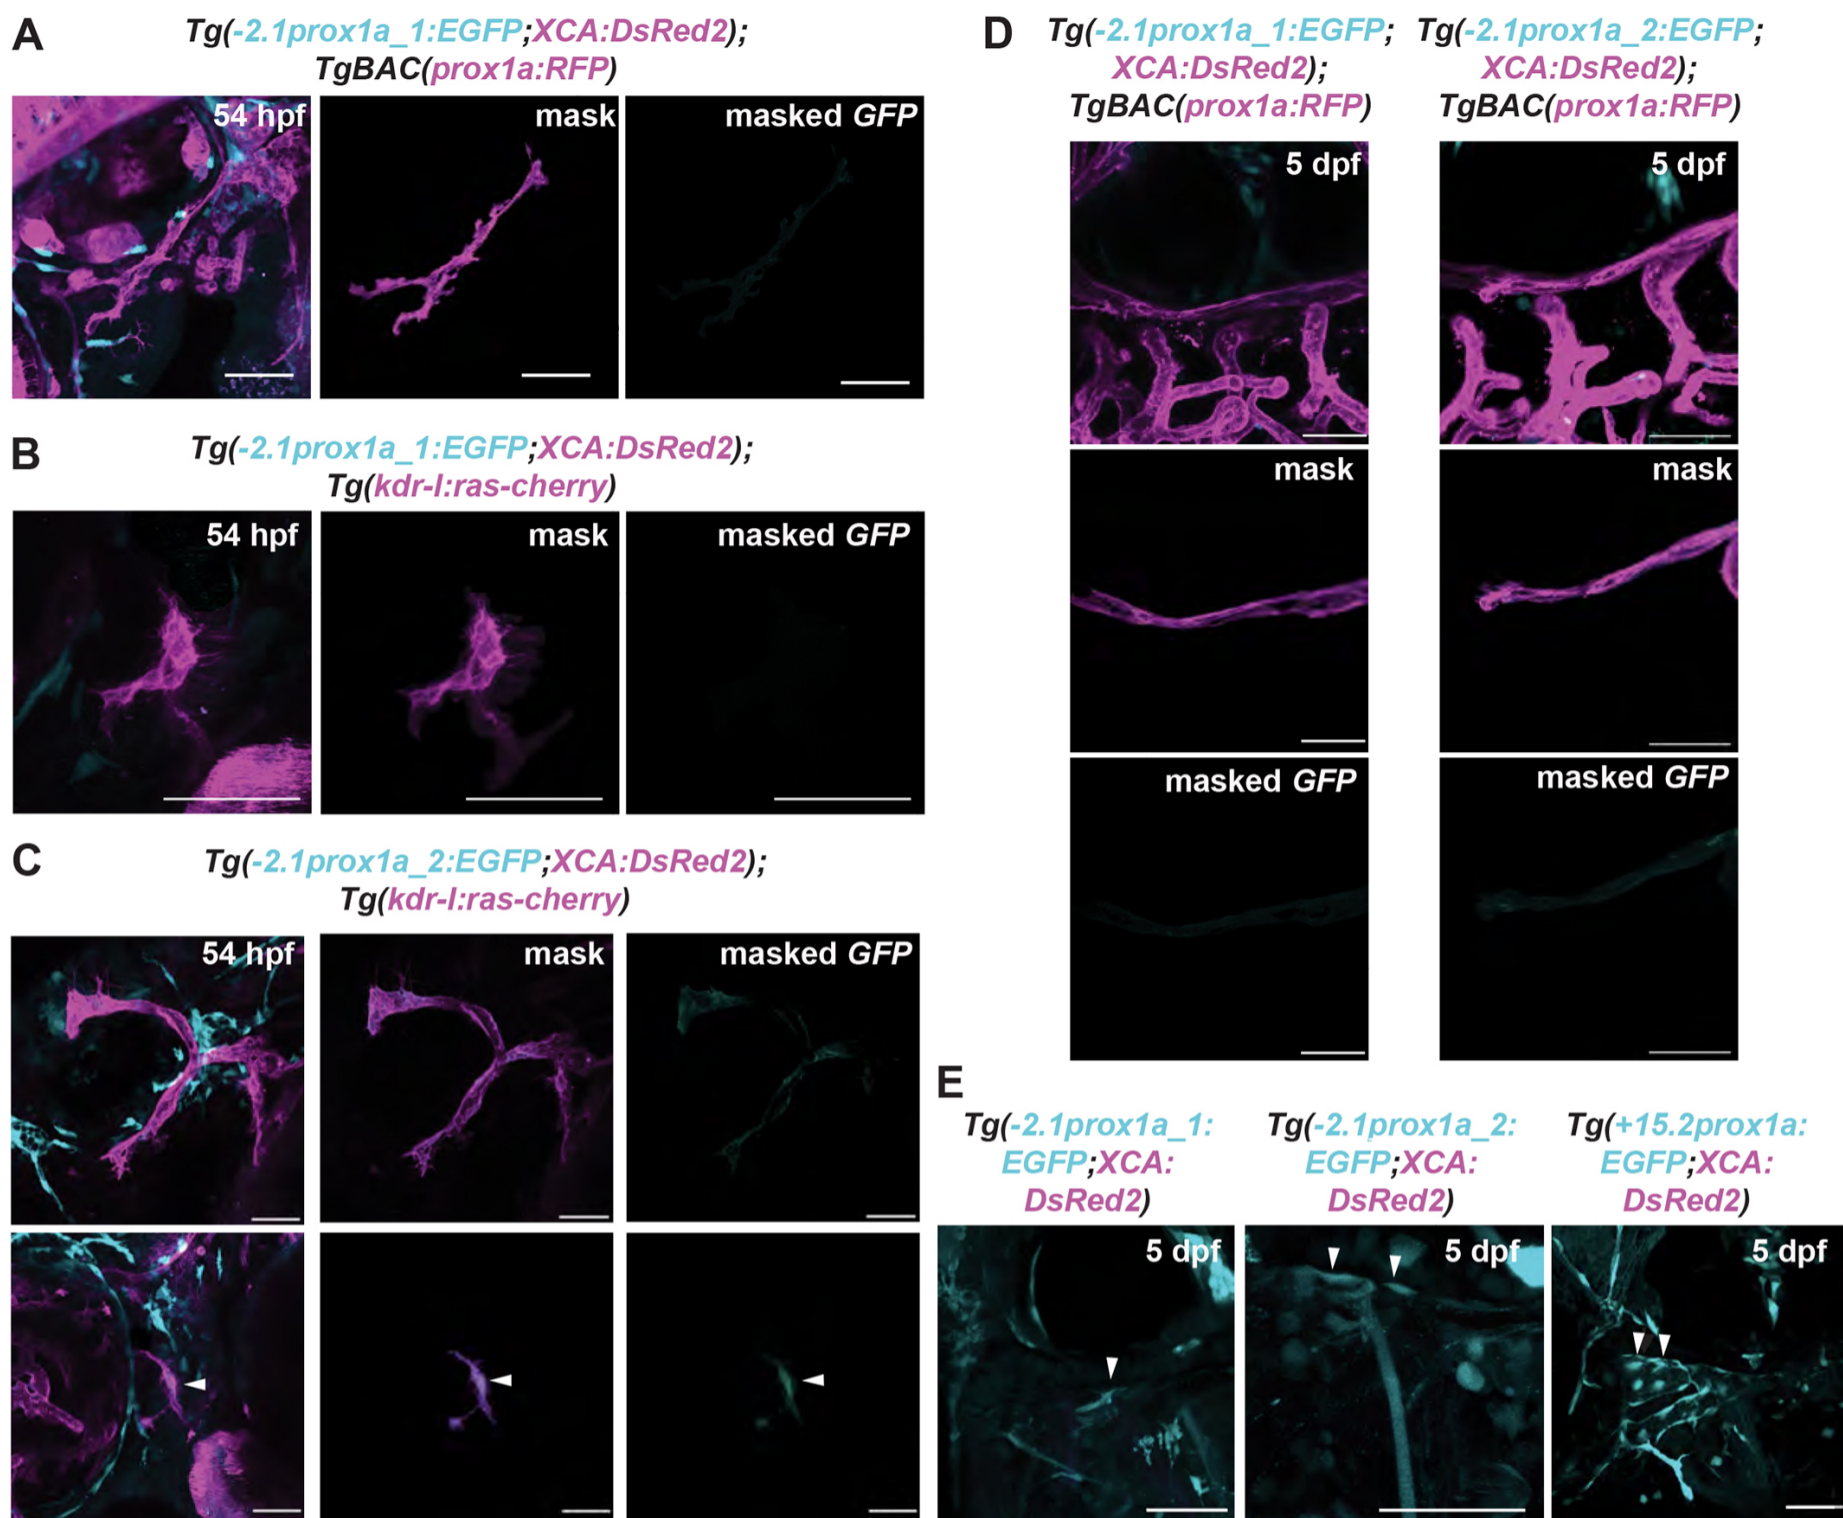

**Fig. S5. Additional characterisation of the core element of -2.1prox1a activity**

(A) Confocal projections of facial lymphatics labelled with  $Tg(-2.1prox1a\_1:EGFP; XCA:DsRed2)^{uu5kk}$  (cyan) and  $Tg(prox1a:RFP)^{nim5}$  (magenta) at 54 hpf, showing no lymphatic expression.

(B) Confocal projections of VA-L labelled with  $Tg(-2.1prox1a\_1:EGFP;XCA:DsRed2)^{uu5kk}$  (cyan) and  $Tg(kdr-l:ras-cherry)^{s916}$  (magenta) at 54 hpf, showing no lymphatic expression.

(C) Confocal projections of facial lymphatics labelled with  $Tg(-2.1prox1a\_2:EGFP; XCA:DsRed2)^{uu6kk}$  (cyan) and  $Tg(kdr-l:ras-cherry)^{s916}$  (magenta) at 54 hpf, showing -2.1prox1a<sub>2</sub> driven expression in the VA-L (arrowhead).

(D) Confocal projections of the primary head sinus labelled with  $Tg(-2.1prox1a\_1:EGFP; XCA:DsRed2)^{uu5kk}$  and  $Tg(-2.1prox1a\_2:EGFP;XCA:DsRed2)^{uu6kk}$  at 5 dpf, showing no expression.

(E) Enhancer-driven expression in  $Tg(-2.1prox1a\_1:EGFP;XCA:DsRed2)^{uu5kk}$ ,  $Tg(-2.1prox1a\_2:EGFP;XCA:DsRed2)^{uu6kk}$  and  $Tg(+15.2prox1a:EGFP;XCA:DsRed2)^{u7k}$  in the facial lymphatics (arrowheads) at 5 dpf, excluding bleed-through as a source of the signal. Scales bars represent 50µm.



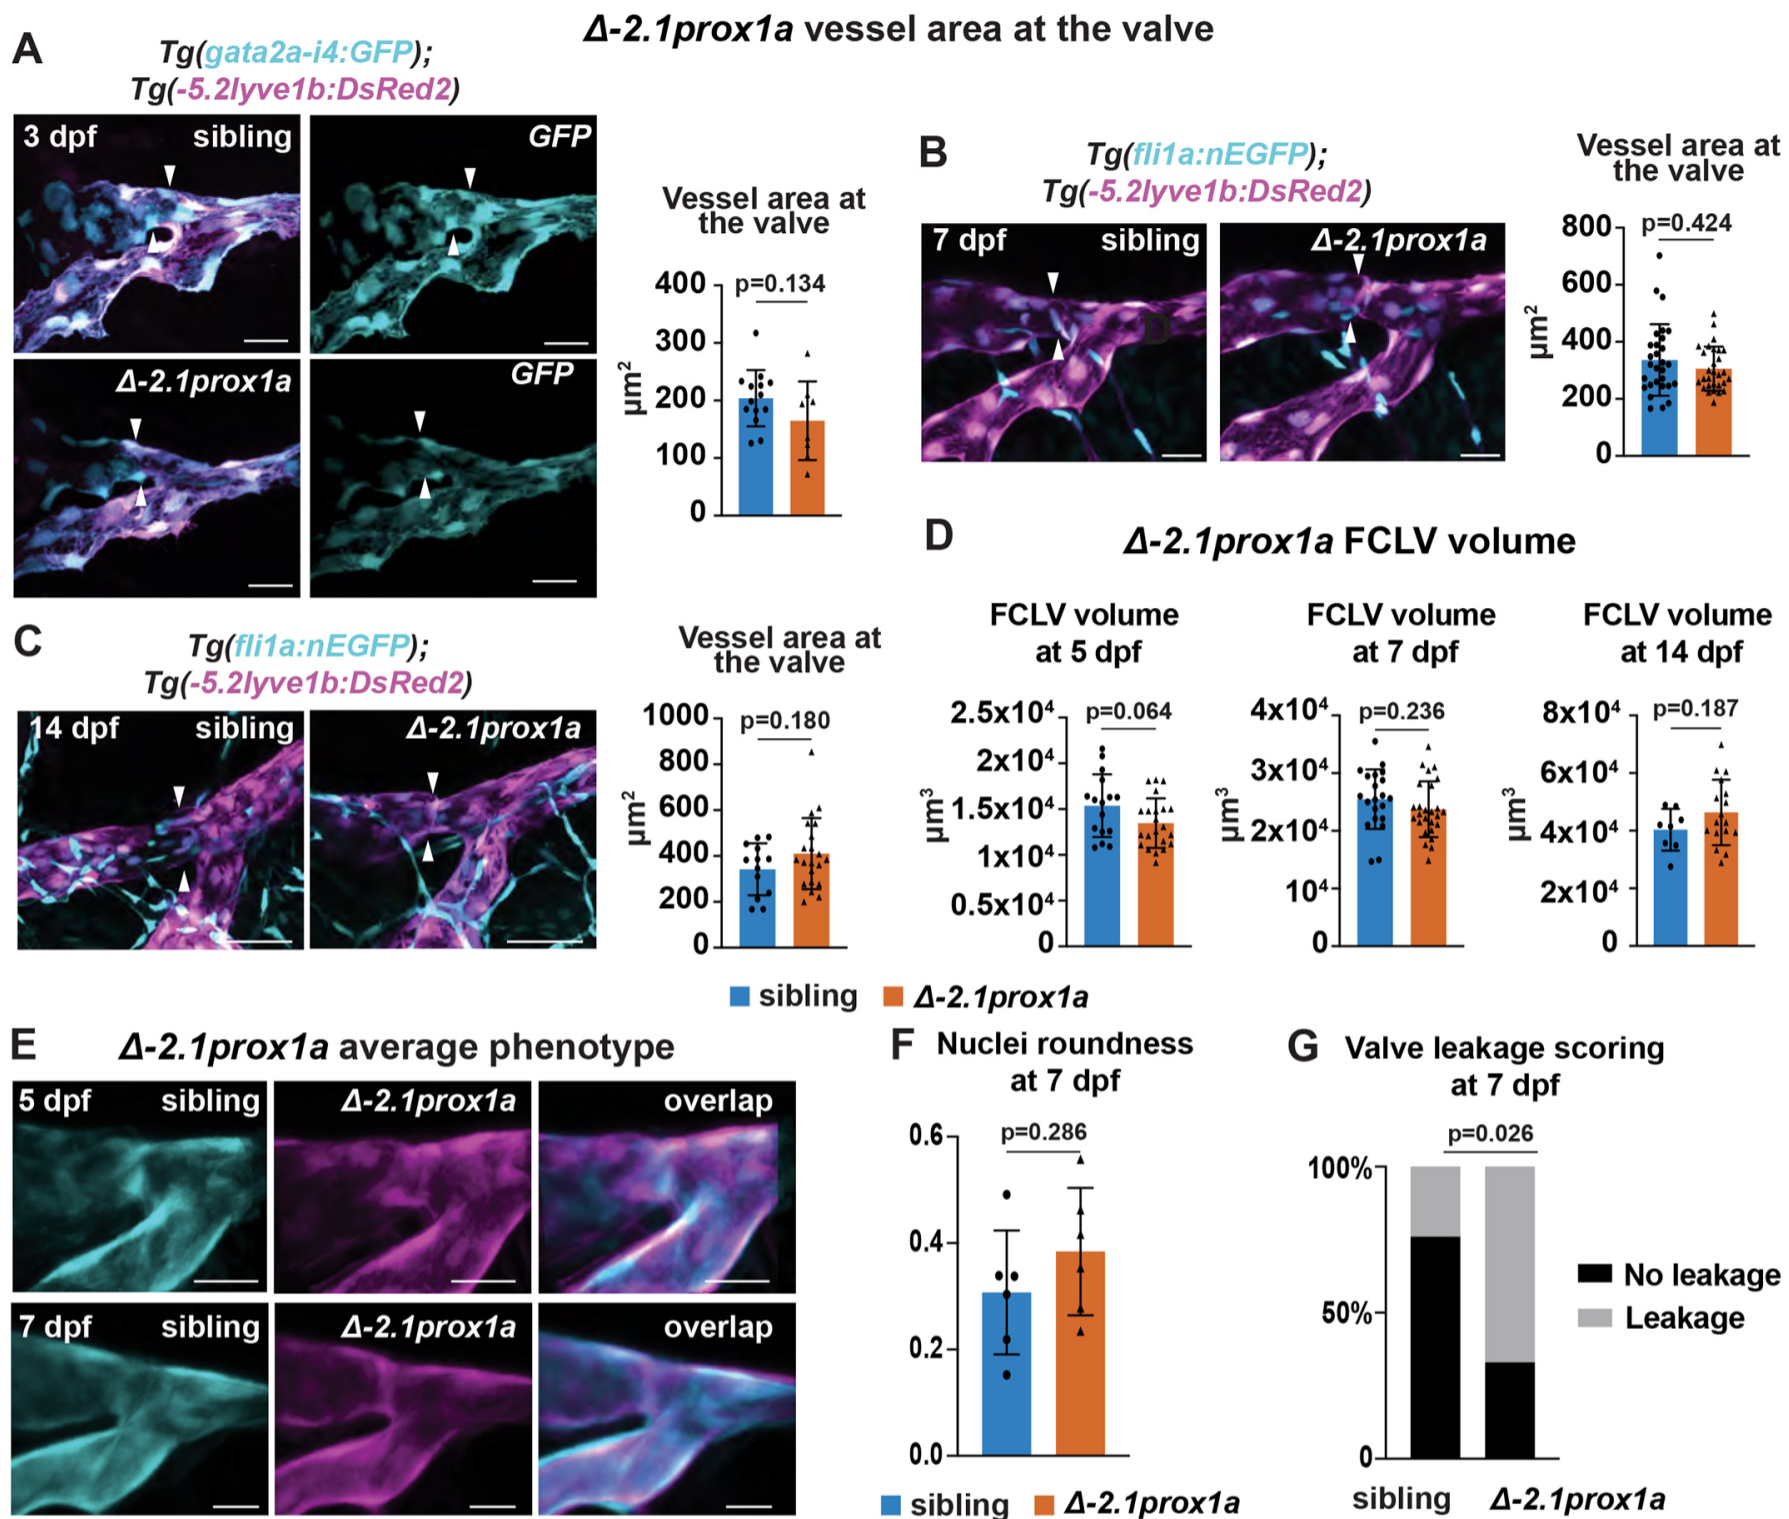

**Fig. S6. Additional characterisation of  $\Delta$ -2.1*prox1a* mutant embryos**

- (A) Confocal projections of *Tg(gata-i4:GFP)<sup>uu11kk</sup>* (cyan) and *Tg(-5.2lyve1b:DsRed2)<sup>nz101</sup>* (magenta) in sibling and  $\Delta$ -2.1*prox1a* mutant embryos at 3 dpf. Quantification of vessel section at the valve (arrowheads) in  $\Delta$ -2.1*prox1a* embryos at 3 dpf. Scale bar: 20 $\mu$ m. Mean  $\pm$  sd, sibling (n=14) vs mutants (n=8): two-tailed Student's t-test, ns (p=0.134). 2 technical replicates, biological replicates correspond to the number of datapoints per condition.
- (B) Confocal projections of *Tg(fli1:nEGFP)<sup>y7</sup>* (cyan) and *Tg(-5.2lyve1b:DsRed2)<sup>nz101</sup>* (magenta) in sibling and  $\Delta$ -2.1*prox1a* mutant embryos at 7 dpf. Quantification of vessel section at the valve (arrowheads) in  $\Delta$ -2.1*prox1a* embryos at 7 dpf. Scale bar: 50 $\mu$ m. Mean  $\pm$  sd, sibling (n=29) vs mutants (n=29), two-tailed Mann-Whitney test, ns (p=0.424). 3 technical replicates, biological replicates correspond to the number of datapoints per condition.
- (C) Confocal projections of *Tg(fli1:nEGFP)<sup>y7</sup>* (cyan) and *Tg(-5.2lyve1b:DsRed2)<sup>nz101</sup>* (magenta) in sibling and  $\Delta$ -2.1*prox1a* mutant embryos at 14 dpf. Quantification of vessel section at the valve (arrowheads) in  $\Delta$ -2.1*prox1a* embryos at 14 dpf. Scale bar: 50 $\mu$ m. Mean  $\pm$  sd, sibling (n=13) vs mutants (n=21): two-tailed Student's t-test, ns (p=0.180). 3 technical replicates, biological replicates correspond to the number of datapoints per condition.
- (D) Quantification of FCLV volume in  $\Delta$ -2.1*prox1a* embryos at 5, 7 and 14 dpf. Mean  $\pm$  sd. Left: two-tailed Student's t-test of 5 dpf siblings (n=16) vs  $\Delta$ -2.1*prox1a* (n=22), ns (p=0.064). Centre: two-tailed Student's t-test of 7 dpf siblings (n=21) vs  $\Delta$ -2.1*prox1a* (n=26), ns (p=0.236). Right: two-tailed Student's t-test of 14dpf siblings (n=8) vs  $\Delta$ -2.1*prox1a* (n=17), ns (p=0.187).
- (E) Average valve phenotype in sibling (cyan) vs  $\Delta$ -2.1*prox1a* (magenta) embryos at 5 dpf and 7 dpf, showing similar gross vessel morphology. Scale bar: 20 $\mu$ m.
- (F) Quantification of sibling (n=6) vs  $\Delta$ -2.1*prox1a* mutant (n=6) valve cell nuclei roundness in TEM-imaged embryos at 7 dpf. Mean  $\pm$  sd. Representative images are present in Fig. 5D. two-tailed Student's t-test, ns (p=0.286). 2 technical replicates, biological replicates correspond to the number of datapoints per condition.
- (G) Scoring of valve leakage in Qtracker injected 7 dpf siblings (n=21) vs  $\Delta$ -2.1*prox1a* (n=12) embryos. Mean  $\pm$  sd. Representative images are present in Fig. 5E. Fisher's test, p=0.026. 2 technical replicates, biological replicates correspond to the number of datapoints per condition.

**Table S1.** mVista analysis sequences

Available for download at  
<https://journals.biologists.com/dev/article-lookup/doi/10.1242/dev.202525#supplementary-data>

**Table S2.** Tested *prox1a* putative CREs

Available for download at  
<https://journals.biologists.com/dev/article-lookup/doi/10.1242/dev.202525#supplementary-data>

**Table S3.** Primers and gRNAs

Available for download at  
<https://journals.biologists.com/dev/article-lookup/doi/10.1242/dev.202525#supplementary-data>

**Table S4.** Conserved motifs detected in evolutionary conserved enhancers

Available for download at  
<https://journals.biologists.com/dev/article-lookup/doi/10.1242/dev.202525#supplementary-data>

**Table S5.** Predicted TFs binding sites in *prox1a* enhancers

Available for download at  
<https://journals.biologists.com/dev/article-lookup/doi/10.1242/dev.202525#supplementary-data>

**Table S6.** Complete list motifs based on zebrafish (p-val < 1e-04)

Available for download at  
<https://journals.biologists.com/dev/article-lookup/doi/10.1242/dev.202525#supplementary-data>

**Table S7.** GO terms enrichment in more and less accessible sequences in LECs

Available for download at  
<https://journals.biologists.com/dev/article-lookup/doi/10.1242/dev.202525#supplementary-data>

**Table S8.** gRNAs used

Available for download at  
<https://journals.biologists.com/dev/article-lookup/doi/10.1242/dev.202525#supplementary-data>

## Additional files are uploaded containing tables separately

### **Table S5A.** Predicted TFs binding sites in *prox1a* enhancers

Available for download at

<https://journals.biologists.com/dev/article-lookup/doi/10.1242/dev.202525#supplementary-data>

### **Table S6A.** Complete list motifs based on zebrafish (p-val < 1e-04)

Available for download at

<https://journals.biologists.com/dev/article-lookup/doi/10.1242/dev.202525#supplementary-data>

### **Table S7A.** GO terms enrichment in more and less accessible sequences in LECs

Available for download at

<https://journals.biologists.com/dev/article-lookup/doi/10.1242/dev.202525#supplementary-data>
